# Supplementary material
Source: HighWire-hosted journal article supplement (https://jnm.snmjournals.org/highwire/filestream/99058/field_highwire_adjunct_files/0/237602_Supplemental_Data.pdf)
Supplement: 237602_Supplemental_Data.pdf [file 237602_Supplemental_Data.pdf]

**PATIENT INFORMATION**

Last name: \_\_\_\_\_ First Name: \_\_\_\_\_

Date of Birth: \_\_\_\_\_ Medical Record Number: \_\_\_\_\_

**1. Indicate where do you know/think that prostate cancer disease is located before <sup>68</sup>Ga-PSMA PET (select all that apply):**

- Prostate fossa
- intrapelvic lymph nodes
- extrapelvic lymph nodes
- bone
- extrapelvic soft-tissue (non-bone)

**2. If <sup>68</sup>Ga-PSMA PET was not available, which other imaging test would you order?**

- |                                      |                                           |
|--------------------------------------|-------------------------------------------|
| <input type="checkbox"/> MRI         | <input type="checkbox"/> Fluciclovine PET |
| <input type="checkbox"/> CT          | <input type="checkbox"/> ProstaScint      |
| <input type="checkbox"/> FDG PET     | <input type="checkbox"/> Bone scan        |
| <input type="checkbox"/> Acetate PET | <input type="checkbox"/> Fluoride PET     |
| <input type="checkbox"/> Choline PET | <input type="checkbox"/> Other: _____     |

**3. If <sup>68</sup>Ga-PSMA PET was not available, which treatment would you recommend/perform?**

- |                                                                       |                                                             |
|-----------------------------------------------------------------------|-------------------------------------------------------------|
| <input type="checkbox"/> Surgery – Prostatectomy                      | <input type="checkbox"/> Androgen deprivation therapy       |
| <input type="checkbox"/> Surgery – Pelvic lymph node dissection       | <input type="checkbox"/> Chemotherapy                       |
| <input type="checkbox"/> Surgery – Elective lymphadenectomy           | <input type="checkbox"/> PSMA Radionuclide therapy          |
| <input type="checkbox"/> XRT - Prostate fossa                         | <input type="checkbox"/> Bone targeted Radionuclide therapy |
| <input type="checkbox"/> XRT - Whole pelvic lymph nodes               | <input type="checkbox"/> Immunotherapy                      |
| <input type="checkbox"/> XRT - Single pelvic lymph node               | <input type="checkbox"/> Active surveillance                |
| <input type="checkbox"/> XRT - Extra-pelvic metastasis                | <input type="checkbox"/> Other (please describe below):     |
| <input type="checkbox"/> Other focal therapy (please describe below): |                                                             |

Referring Physician Name: \_\_\_\_\_

Signature: \_\_\_\_\_ Date: \_\_\_\_\_

**PATIENT INFORMATION**

Last name: \_\_\_\_\_ First Name: \_\_\_\_\_

Date of Birth: \_\_\_\_\_ Medical Record Number: \_\_\_\_\_

**1. Indicate where do you know/think that prostate cancer disease is located after <sup>68</sup>Ga-PSMA PET (select all that apply):**

- Unknown
- Prostate fossa
- intrapelvic lymph nodes
- extrapelvic lymph nodes
- bone
- extrapelvic soft-tissue (non-bone)

**2. Did the <sup>68</sup>Ga-PSMA PET enable you to avoid any diagnostic procedure?**

- Yes
- No

If yes, which one? \_\_\_\_\_

**3. Did the <sup>68</sup>Ga-PSMA PET result in any diagnostic procedure?**

- Yes
- No

If yes, which one? \_\_\_\_\_

**4. Based on <sup>68</sup>Ga-PSMA PET findings what is your treatment plan?**

- |                                                                       |                                                             |
|-----------------------------------------------------------------------|-------------------------------------------------------------|
| <input type="checkbox"/> Surgery – Prostatectomy                      | <input type="checkbox"/> Androgen deprivation therapy       |
| <input type="checkbox"/> Surgery – Pelvic lymph node dissection       | <input type="checkbox"/> Chemotherapy                       |
| <input type="checkbox"/> Surgery – Elective lymphadenectomy           | <input type="checkbox"/> PSMA Radionuclide therapy          |
| <input type="checkbox"/> XRT - Prostate fossa                         | <input type="checkbox"/> Bone targeted Radionuclide therapy |
| <input type="checkbox"/> XRT - Whole pelvic lymph nodes               | <input type="checkbox"/> Immunotherapy                      |
| <input type="checkbox"/> XRT - Single pelvic lymph node               | <input type="checkbox"/> Active surveillance                |
| <input type="checkbox"/> XRT - Extra-pelvic metastasis                | <input type="checkbox"/> Other (please describe below):     |
| <input type="checkbox"/> Other focal therapy (please describe below): |                                                             |

Referring Physician Name: \_\_\_\_\_

Date: \_\_\_\_\_ Signature: \_\_\_\_\_

|                            |                              |
|----------------------------|------------------------------|
| <b>PATIENT INFORMATION</b> |                              |
| Last name: _____           | First Name: _____            |
| _____                      |                              |
| Date of Birth: _____       | Medical Record Number: _____ |

**1. Were any of the following diagnostic procedure performed after the <sup>68</sup>Ga-PSMA PET/CT?**

- |                                         |                                  |
|-----------------------------------------|----------------------------------|
| <input type="checkbox"/> Biopsy/Surgery | <input type="checkbox"/> CT      |
| <input type="checkbox"/> MRI            | <input type="checkbox"/> PET/CT  |
| <input type="checkbox"/> Bone scan      | <input type="checkbox"/> Other : |

**If Yes,** please indicate the date and the findings :

\_\_\_\_\_

\_\_\_\_\_

**2. On the post scan questionnaire (questionnaire #2) you indicated an intended treatment management of:**

- |                                                                       |                                                             |
|-----------------------------------------------------------------------|-------------------------------------------------------------|
| <input type="checkbox"/> Surgery – Prostatectomy                      | <input type="checkbox"/> Androgen deprivation therapy       |
| <input type="checkbox"/> Surgery – Pelvic lymph node dissection       | <input type="checkbox"/> Chemotherapy                       |
| <input type="checkbox"/> Surgery – Elective lymphadenectomy           | <input type="checkbox"/> PSMA Radionuclide therapy          |
| <input type="checkbox"/> XRT - Prostate fossa                         | <input type="checkbox"/> Bone targeted Radionuclide therapy |
| <input type="checkbox"/> XRT - Whole pelvic lymph nodes               | <input type="checkbox"/> Immunotherapy                      |
| <input type="checkbox"/> XRT - Single pelvic lymph node               | <input type="checkbox"/> Active surveillance                |
| <input type="checkbox"/> XRT - Extra-pelvic metastasis                | <input type="checkbox"/> Other (please describe below):     |
| <input type="checkbox"/> Other focal therapy (please describe below): |                                                             |

**3. Please indicate whether the intended management noted on the post scan questionnaire (questionnaire #2) was implemented:**

- Yes
- No

**If No,** please indicate why: \_\_\_\_\_

\_\_\_\_\_

Referring Physician Name: \_\_\_\_\_

Date: \_\_\_\_\_ Signature: \_\_\_\_\_

**Supplemental Figure 1: Questionnaires.**

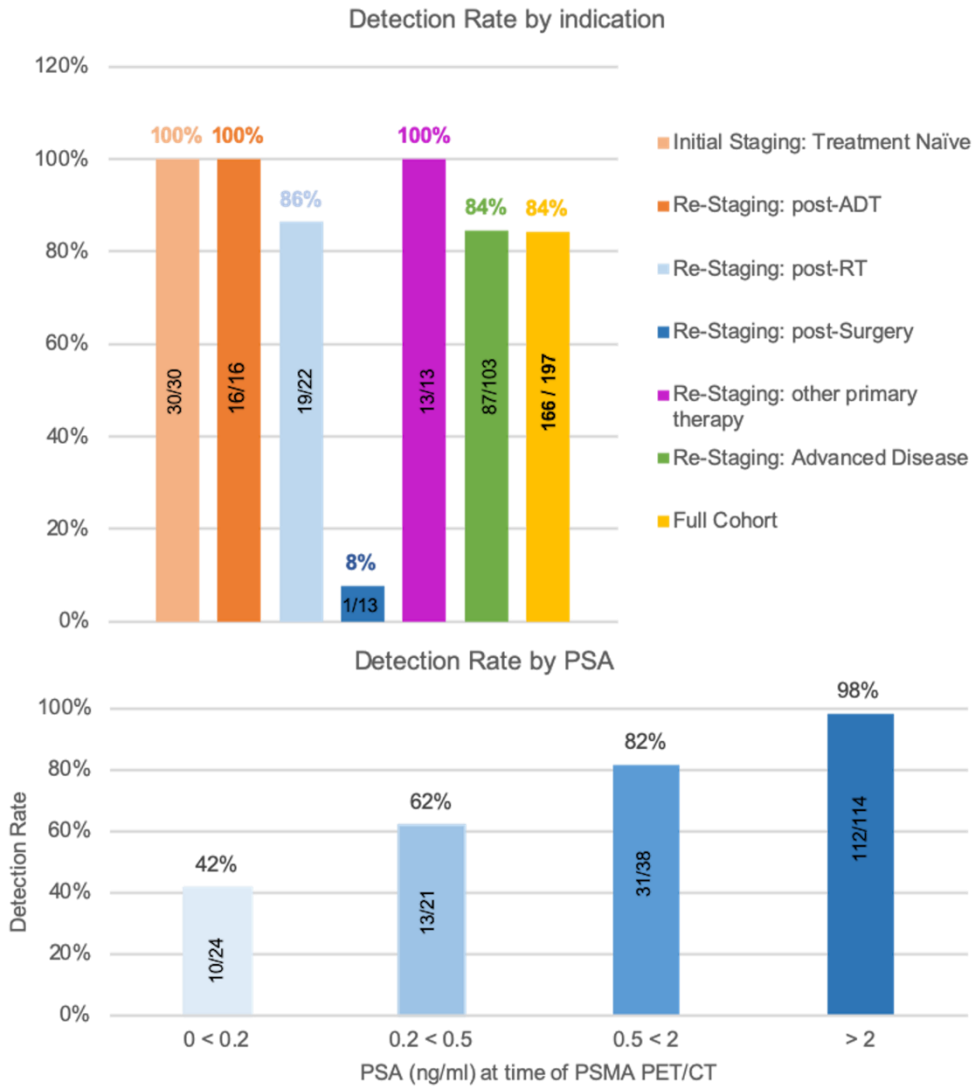

**Supplemental Figure 2.** Detection rate stratified by sub-groups (upper image) and PSA levels (lower image).

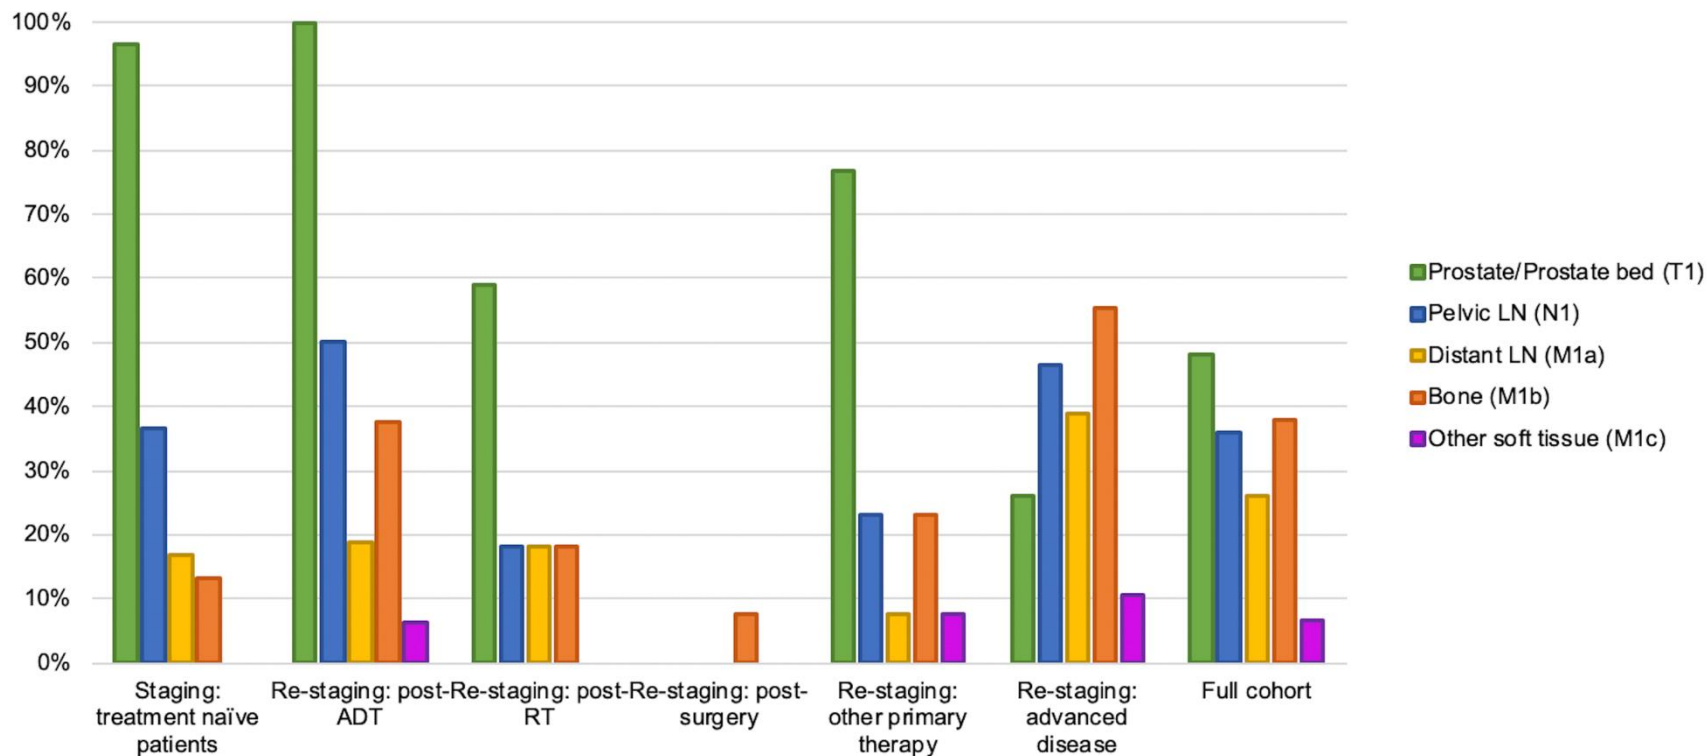

**Supplemental Figure 3:** Location of disease based on PSMA PET/CT results. ADT: androgen deprivation therapy; RT: radiation therapy; LN: lymph nodes

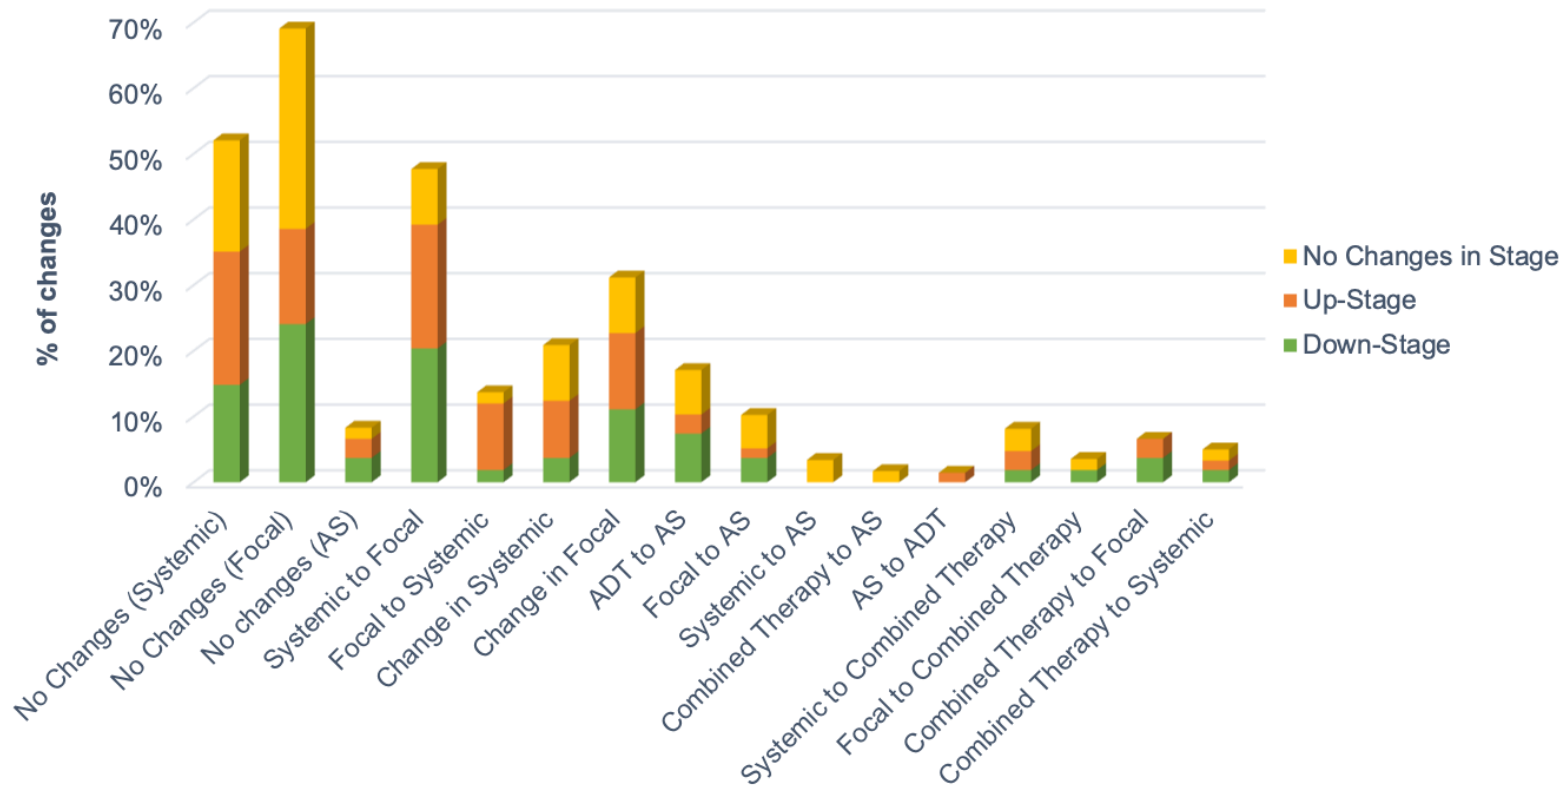

**Supplemental Figure 4.** Impact of PSMA PET/CT imaging on management stratified by changes in stage.

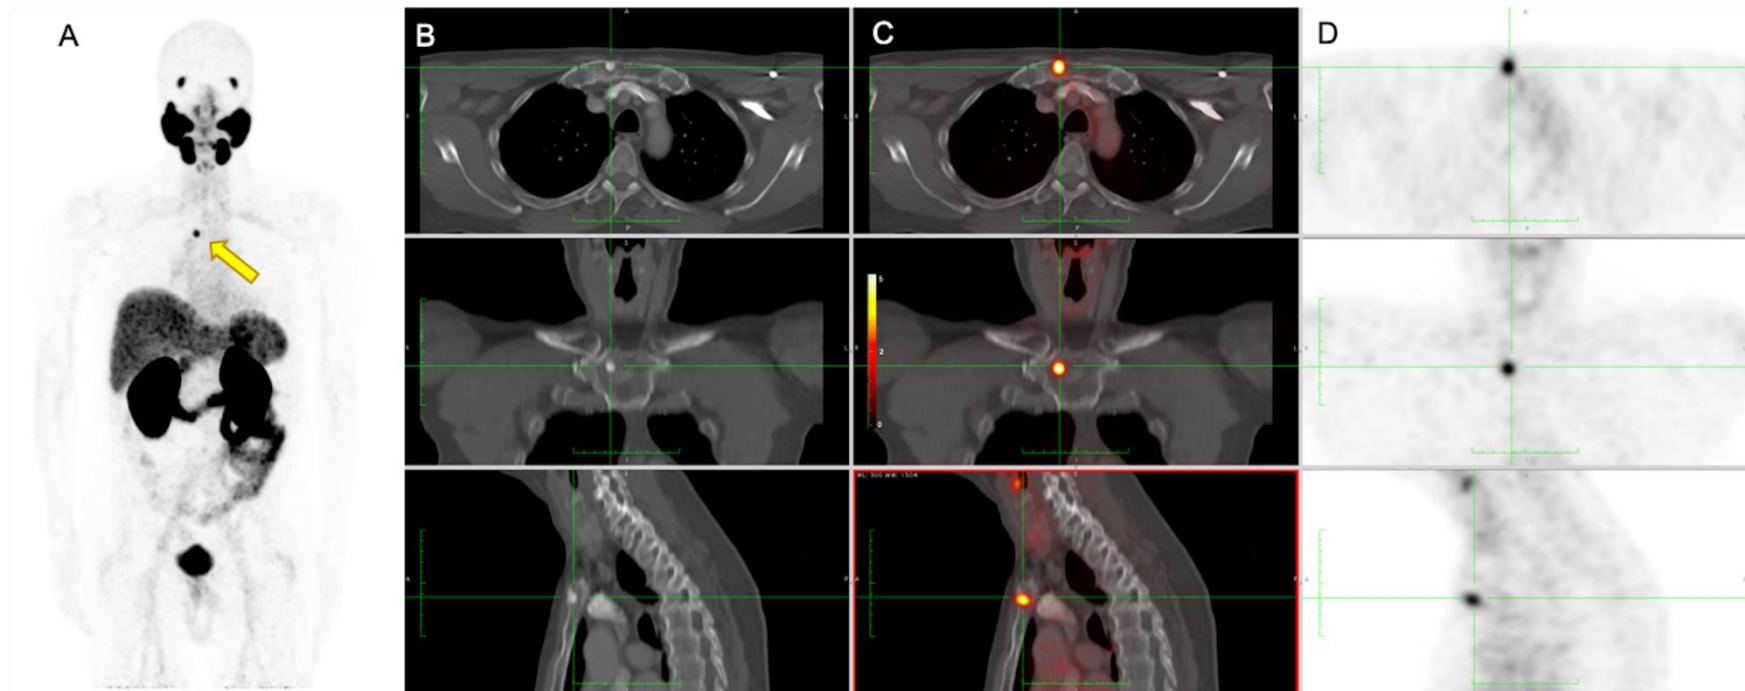

**Supplemental Figure 5.** Example of a change in management: 54-year-old patient with increasing serum PSA levels post multiple treatments (advanced disease sub-group). PSA at time of PSMA PET/CT was 0.29 ng/ml. Radical prostatectomy on 3/2006 (Gleason Score 3+4=7 with extracapsular extension) and adjuvant radiation therapy on the prostatic fossa on 9/2007. In 2010, due to increasing PSA values, the patient started first-line hormonal therapy and developed castration-resistant prostate cancer in 2013. The patient was treated with two different immunotherapies with temporary reduction of PSA levels, but in 4/2017 serum PSA levels started to increase. The intended treatment before PSMA PET/CT was continuation of ADT. PSMA PET/CT on 4/2018 detected a single focus

of increased uptake in the sternum. The lesion was treated with stereotactic RT on 5/2018. PSA started decreasing in 10/2018, became undetectable on 4/2019 and remained so until the day this manuscript was finalized. <sup>68</sup>Ga-PSMA-11 PET/CT MIP (A), CT (row B), fusion PSMA PET/CT (row C) and PET (row D).



|                              | Staging:<br>treatment naive<br>patients | Re-Staging:<br>Post-ADT | Re-staging:<br>Post-RT | Re-staging:<br>Post-surgery | Re-staging:<br>Advanced<br>Disease | Re-staging: other<br>primary therapy | TOT        | Down-stage | Up-stage  | No Change in<br>stage |
|------------------------------|-----------------------------------------|-------------------------|------------------------|-----------------------------|------------------------------------|--------------------------------------|------------|------------|-----------|-----------------------|
| No Changes (Systemic)        | 1 (4%)                                  | 2 (13%)                 | 1 (6%)                 | 0                           | 28 (29%)                           | 0                                    | 32 (18%)   | 8 (15%)    | 14 (20%)  | 10 (17%)              |
| No Changes (Focal)           | 14 (50%)                                | 7 (47%)                 | 3 (17%)                | 7 (54%)                     | 6 (6%)                             | 4 (33%)                              | 41 (23%)   | 13 (24%)   | 10 (14%)  | 18 (31%)              |
| No changes (AS)              | 1 (4%)                                  | 0                       | 1 (6%)                 | 0                           | 3 (3%)                             | 0                                    | 5 (3%)     | 2 (4%)     | 2 (3%)    | 1 (2%)                |
| Systemic to Focal            | 0                                       | 2 (13%)                 | 4 (22%)                | 2 (15%)                     | 19 (20%)                           | 2 (17%)                              | 29 (16%)   | 11 (20%)   | 13 (19%)  | 5 (8%)                |
| Focal to Systemic            | 1 (4%)                                  | 1 (7%)                  | 3 (17%)                | 0                           | 4 (4%)                             | 0                                    | 9 (5%)     | 1 (2%)     | 7 (10%)   | 1 (2%)                |
| Change in Systemic           | 0                                       | 0                       | 0                      | 0                           | 13 (14%)                           | 0                                    | 13 (7%)    | 2 (4%)     | 6 (9%)    | 5 (8%)                |
| Change in Focal              | 9 (32%)                                 | 2 (13%)                 | 0                      | 1 (8%)                      | 2 (2%)                             | 5 (42%)                              | 19 (10%)   | 6 (11%)    | 8 (12%)   | 5 (8%)                |
| ADT to AS                    | 0                                       | 0                       | 2 (11%)                | 2 (11%)                     | 6 (6%)                             | 0                                    | 10 (5%)    | 4 (7%)     | 2 (3%)    | 4 (7%)                |
| Focal to AS                  | 1 (4%)                                  | 0                       | 2 (11%)                | 2 (15%)                     | 0                                  | 1 (8%)                               | 6 (3%)     | 2 (4%)     | 1 (1%)    | 3 (5%)                |
| Systemic to AS               | 0                                       | 0                       | 0                      | 0                           | 2 (2%)                             | 0                                    | 2 (1%)     | 0          | 0         | 2 (3%)                |
| Combined Therapy to AS       | 0                                       | 0                       | 0                      | 0                           | 1(1%)                              | 0                                    | 1 (1%)     | 0          | 0         | 1 (2%)                |
| AS to ADT                    | 0                                       | 0                       | 1 (6%)                 | 0                           | 0                                  | 0                                    | 1 (1%)     | 0          | 1 (1%)    | 0                     |
| Systemic to Combined Therapy | 0                                       | 0                       | 0                      | 0                           | 5 (5%)                             | 0                                    | 5 (3%)     | 1 (2%)     | 2 (3%)    | 2 (3%)                |
| Focal to Combined Therapy    | 0                                       | 0                       | 0                      | 0                           | 2 (2%)                             | 0                                    | 2 (1%)     | 1 (2%)     | 0         | 1 (2%)                |
| Combined Therapy to Focal    | 1 (4%)                                  | 0                       | 0                      | 0                           | 3 (3%)                             | 0                                    | 4 (2%)     | 2 (4%)     | 2 (3%)    | 0                     |
| Combined Therapy to Systemic | 0                                       | 1 (7%)                  | 0                      | 0                           | 2 (3%)                             | 0                                    | 3 (2%)     | 1 (2%)     | 1 (1%)    | 1 (2%)                |
| TOT                          | 28 (100%)                               | 15 (100%)               | 18 (100%)              | 13 (100%)                   | 96 (100%)                          | 12 (100%)                            | 182 (100%) | 54 (100%)  | 69 (100%) | 59 (100%)             |
| Tot No Change                | 16 (57%)                                | 9 (60%)                 | 5 (28%)                | 7 (54%)                     | 37 (39%)                           | 4 (33%)                              | 78 (43%)   |            |           |                       |
| Tot CHANGE                   | 12 (43%)                                | 6 (40%)                 | 13 (72%)               | 6 (46%)                     | 59 (61%)                           | 8 (67%)                              | 104 (57%)  |            |           |                       |

**Supplemental Table 1.** Detailed analysis of changes in management stratified by clinical indication and by changes in stage. In parenthesis are percentages by column.
